# Supplementary material for: Triple-Negative Essential Thrombocythemia: Clinical-Pathological and Molecular Features. A Single-Center Cohort Study
Source: PubMed Central journal article supplement (PMC8006378; doi:10.3389/fonc.2021.637116), 2021-03-12
Supplement: Data_Sheet_1.pdf [file Data_Sheet_1.pdf]

## Supplementary Material

**Supplementary Table 1.** List of DNA targets included in the panel

### Hotspot gene (23)

|              |              |             |              |               |             |              |               |               |              |
|--------------|--------------|-------------|--------------|---------------|-------------|--------------|---------------|---------------|--------------|
| <i>ABL1</i>  | <i>BRAF</i>  | <i>CBL</i>  | <i>CSF3R</i> | <i>DNMT3A</i> | <i>FLT3</i> | <i>GATA2</i> | <i>HRAS</i>   | <i>IDH1</i>   | <i>IDH2</i>  |
| <i>JAK2</i>  | <i>KIT</i>   | <i>KRAS</i> | <i>MPL</i>   | <i>MYD88</i>  | <i>NPM1</i> | <i>NRAS</i>  | <i>PTPN11</i> | <i>SETBP1</i> | <i>SF3B1</i> |
| <i>SRSF2</i> | <i>U2AF1</i> | <i>WT1</i>  |              |               |             |              |               |               |              |

### Full gene (17)

|              |              |              |              |             |             |              |            |             |              |
|--------------|--------------|--------------|--------------|-------------|-------------|--------------|------------|-------------|--------------|
| <i>ASXL1</i> | <i>BCOR</i>  | <i>CALR</i>  | <i>CEBPA</i> | <i>ETV6</i> | <i>EZH2</i> | <i>IKZF1</i> | <i>NF1</i> | <i>PHF6</i> | <i>PRPF8</i> |
| <i>RB1</i>   | <i>RUNX1</i> | <i>SH2B3</i> | <i>STAG2</i> | <i>TET2</i> | <i>TP53</i> | <i>ZRSR2</i> |            |             |              |

(ref. <https://science-docs.illumina.com/documents/LibraryPrep/ampliseq-myeloid-panel-data-sheet-770-2018-016/Content/Source/Library-Prep/AmpliSeq/myeloid-panel/ampliseq-myeloid-panel-data-sheet.html#Introduction>)

**Supplementary Table 2.** Description of identified variants

| Gene       | CDS mutation | AA change       | Variant type                                         | rs (dbSNP)  | COSMIC ID   | Variant classification*                           | MAF (dbSNP) | FATHMM-MKL | SIFT                   | DANN      | PolyPhen-2           | Sample name | Observed VAF |
|------------|--------------|-----------------|------------------------------------------------------|-------------|-------------|---------------------------------------------------|-------------|------------|------------------------|-----------|----------------------|-------------|--------------|
| ASXL1      | c.4189G>A    | p.G1397S        | missense_v<br>ariant                                 | rs146464648 | COSM133033  | P <sup>1</sup> /B <sup>2-3</sup>                  | 0.0008      | Damaging   | Damaging               | Damaging  | Possibly<br>damaging | TN_01       | 0.45         |
| ASXL1      | c.2595del    | p.E865Dfs*<br>2 | Deletion -<br>Frameshift                             | -           | COSM5985563 | na <sup>1</sup> /P <sup>2</sup> /LP <sup>3</sup>  | -           | na         | na                     | na        | na                   | TN_11       | 0.48         |
| ASXL1      | c.2985C>T    | p.H995=         | synonymou<br>s_variant                               | rs62206933  | COSM6232766 | P <sup>1</sup> /B <sup>2-3</sup>                  | 0.009       | Damaging   | na                     | Tolerated | na                   | TN_33       | 0.52         |
| CEBPA      | c.152G>A     | p.P51L          | missense_v<br>ariant                                 | rs134120588 | -           | na <sup>1</sup> /VUS <sup>2-3</sup>               | 0.000008    | Damaging   | Damaging               | Damaging  | Benign               | TN_43       | 0.48         |
| ETV6       | c.628C>T     | p.R210C         | missense_v<br>ariant                                 | rs762232508 | COSM3456948 | P <sup>1</sup> /B <sup>2</sup> /VUS <sup>3</sup>  | 0.000076    | Damaging   | Tolerated              | Damaging  | Probably<br>damaging | TN_42       | 0.49         |
| ETV6       | c.542G>A     | p.R181H         | missense_v<br>ariant                                 | rs150089916 | -           | na <sup>1</sup> /B <sup>2</sup> /VUS <sup>3</sup> | 0.0004      | Damaging   | Damaging               | Damaging  | Probably<br>damaging | TN_57       | 0.50         |
| EZH2       | c.553G>C     | p.D185H         | missense_v<br>ariant                                 | rs2302427   | COSM3762469 | P <sup>1</sup> /B <sup>2-3</sup>                  | 0.07        | Damaging   | Damaging               | Damaging  | Benign               | TN_10       | 0.49         |
|            |              |                 |                                                      |             |             |                                                   |             |            |                        |           |                      | TN_41       | 0.49         |
|            |              |                 |                                                      |             |             |                                                   |             |            |                        |           |                      | TN_43       | 0.51         |
|            |              |                 |                                                      |             |             |                                                   |             |            |                        |           |                      | TN_55       | 0.49         |
|            |              |                 |                                                      |             |             |                                                   |             |            |                        |           |                      | TN_59       | 0.49         |
| TN_63      | 0.49         |                 |                                                      |             |             |                                                   |             |            |                        |           |                      |             |              |
| TN_02      | 0.52         |                 |                                                      |             |             |                                                   |             |            |                        |           |                      |             |              |
| TN_03      | 0.49         |                 |                                                      |             |             |                                                   |             |            |                        |           |                      |             |              |
| IDH1       | c.315C>T     | p.G105=         | synonymou<br>s_variant                               | rs11554137  | COSM1741220 | P <sup>1</sup> /B <sup>2-3</sup>                  | 0.05        | Damaging   | na                     | Tolerated | Na                   | TN_18       | 0.24         |
|            |              |                 |                                                      |             |             |                                                   |             |            |                        |           |                      | TN_23       | 0.49         |
|            |              |                 |                                                      |             |             |                                                   |             |            |                        |           |                      | TN_42       | 0.49         |
|            |              |                 |                                                      |             |             |                                                   |             |            |                        |           |                      | TN_54       | 0.27         |
|            |              |                 |                                                      |             |             |                                                   |             |            |                        |           |                      | TN_22       | 0.49         |
| IKZF1      | c.1176C>T    | p.N392=         | synonymou<br>s_variant                               | rs61731356  | COSM4162286 | P <sup>1</sup> /B <sup>2-3</sup>                  | 0.05        | Damaging   | na                     | Tolerated | Na                   | TN_31       | 0.48         |
|            |              |                 |                                                      |             |             |                                                   |             |            |                        |           |                      | TN_42       | 0.50         |
| KIT        | c.1621A>C    | p.M541L         | missense_v<br>ariant                                 | rs3822214   | COSM28026   | P <sup>1</sup> /B <sup>2-3</sup>                  | 0.07        | Damaging   | Tolerated              | Tolerated | Benign               | TN_04       | 0.49         |
|            |              |                 |                                                      |             |             |                                                   |             |            |                        |           |                      | TN_20       | 0.48         |
|            |              |                 |                                                      |             |             |                                                   |             |            |                        |           |                      | TN_22       | 0.98         |
|            |              |                 |                                                      |             |             |                                                   |             |            |                        |           |                      | TN_37       | 0.49         |
| KIT        | c.1638A>G    | p.K546=         | Synonym.u<br>s_variant                               | rs55986963  | COSM21983   | P <sup>1</sup> /B <sup>2-3</sup>                  | 0.02        | Damaging   | na                     | Tolerated | Na                   | TN_11       | 0.51         |
|            |              |                 |                                                      |             |             |                                                   |             |            |                        |           |                      | TN_14       | 0.48         |
| KIT        | c.67+4G>A    | p.?             | splice_regio<br>n_variant,in<br>tron_variant         | rs72550820  | COSM5020196 | P <sup>1</sup> /B <sup>2-3</sup>                  | 0.02        | Damaging   | na                     | Tolerated | Na                   | TN_14       | 0.50         |
|            |              |                 |                                                      |             |             |                                                   |             |            |                        |           |                      | TN_47       | 0.49         |
| KIT        | c.2394C>T    | p.I798=         | synonymou<br>s_variant                               | rs55789615  | COSM1307    | P <sup>1</sup> /B <sup>2-3</sup>                  | 0.02        | Damaging   | na                     | Tolerated | Na                   | TN_18       | 0.46         |
|            |              |                 |                                                      |             |             |                                                   |             |            |                        |           |                      | TN_27       | 0.50         |
|            |              |                 |                                                      |             |             |                                                   |             |            |                        |           |                      | TN_46       | 0.49         |
| RB1        | c.929G>A     | p.G310E         | missense_v<br>ariant                                 | rs200844292 | COSM327253  | P <sup>1</sup> /B <sup>2</sup> /VUS <sup>3</sup>  | 0.0003      | Damaging   | Tolerated              | Damaging  | Probably<br>damaging | TN_03       | 0.49         |
|            |              |                 |                                                      |             |             |                                                   |             |            |                        |           |                      | TN_18       | 0.26         |
| RILP/PRPF8 | c.6294G>A    | p.K2098=        | upstream_g<br>ene_variant,<br>synonymou<br>s_variant | rs11559309  | COSM5021164 | P <sup>1</sup> /B <sup>2-3</sup>                  | 0.04        | Damaging   | na                     | Tolerated | Na                   | TN_03       | 0.46         |
|            |              |                 |                                                      |             |             |                                                   |             |            |                        |           |                      | TN_09       | 0.52         |
|            |              |                 |                                                      |             |             |                                                   |             |            |                        |           |                      | TN_16       | 0.50         |
|            |              |                 |                                                      |             |             |                                                   |             |            |                        |           |                      | TN_18       | 0.23         |
|            |              |                 |                                                      |             |             |                                                   |             |            |                        |           |                      | TN_31       | 0.48         |
| TN_35      | 0.51         |                 |                                                      |             |             |                                                   |             |            |                        |           |                      |             |              |
| TN_57      | 0.27         |                 |                                                      |             |             |                                                   |             |            |                        |           |                      |             |              |
| PRPF8      | c.3455C>T    | p.A1152V        | missense_v<br>ariant                                 | -           | -           | na <sup>1</sup> /VUS <sup>2-3</sup>               | -           | Damaging   | Damaging               | Damaging  | Probably<br>damaging | TN_16       | 0.11         |
| RUNX1      | c.167T>C     | p.L56S          | missense_v<br>ariant                                 | rs111527738 | COSM24756   | P <sup>1</sup> /B <sup>2-3</sup>                  | 0.015       | Damaging   | Tolerated              | Tolerated | Na                   | TN_31       | 0.49         |
|            |              |                 |                                                      |             |             |                                                   |             |            |                        |           |                      | TN_54       | 0.48         |
|            |              |                 |                                                      |             |             |                                                   |             |            |                        |           |                      | TN_58       | 0.48         |
| SH2B3      | c.1421C>T    | p.T474M         | missense_v<br>ariant                                 | rs200567433 | COSM5519182 | P <sup>1</sup> /VUS <sup>2-3</sup>                | 0.000165    | Damaging   | Damaging               | Damaging  | Probably<br>damaging | TN_22       | 0.53         |
| STAG2      | c.1108C>T    | p.R370W         | missense_v<br>ariant                                 | -           | COSM1315173 | P <sup>1</sup> /LP <sup>2</sup> /VUS <sup>3</sup> | -           | Damaging   | Damaging               | Damaging  | Probably<br>damaging | TN_03       | 0.07         |
| TET2       | c.86C>G      | p.P29R          | missense_v<br>ariant                                 | rs12498609  | COSM5020248 | P <sup>1</sup> /B <sup>2-3</sup>                  | 0.06        | Damaging   | Tolerated/D<br>amaging | Damaging  | Possibly<br>damaging | TN_01       | 0.48         |
|            |              |                 |                                                      |             |             |                                                   |             |            |                        |           |                      | TN_09       | 0.52         |
|            |              |                 |                                                      |             |             |                                                   |             |            |                        |           |                      | TN_22       | 0.52         |
|            |              |                 |                                                      |             |             |                                                   |             |            |                        |           |                      | TN_27       | 0.47         |
|            |              |                 |                                                      |             |             |                                                   |             |            |                        |           |                      | TN_32       | 0.48         |
| TN_63      | 0.50         |                 |                                                      |             |             |                                                   |             |            |                        |           |                      |             |              |
| TET2       | c.3743T>G    | p.L1248R        | missense_v<br>ariant                                 | rs372179780 | COSM5879020 | P <sup>1</sup> /LP <sup>2</sup> /VUS <sup>3</sup> | -           | Damaging   | Damaging               | Damaging  | Probably<br>damaging | TN_03       | 0.12         |
|            |              |                 |                                                      |             |             |                                                   |             |            |                        |           |                      | TN_18       | 0.06         |
| TET2       | c.5162T>G    | p.L1721W        | missense_v<br>ariant                                 | rs34402524  | COSM5020013 | P <sup>1</sup> /B <sup>2-3</sup>                  | 0.11        | Damaging   | Damaging               | Tolerated | Possibly<br>damaging | TN_09       | 0.51         |
|            |              |                 |                                                      |             |             |                                                   |             |            |                        |           |                      | TN_14       | 0.48         |
|            |              |                 |                                                      |             |             |                                                   |             |            |                        |           |                      | TN_17       | 0.42         |
|            |              |                 |                                                      |             |             |                                                   |             |            |                        |           |                      | TN_19       | 0.48         |
|            |              |                 |                                                      |             |             |                                                   |             |            |                        |           |                      | TN_26       | 0.51         |
|            |              |                 |                                                      |             |             |                                                   |             |            |                        |           |                      | TN_31       | 0.50         |
|            |              |                 |                                                      |             |             |                                                   |             |            |                        |           |                      | TN_35       | 0.50         |
|            |              |                 |                                                      |             |             |                                                   |             |            |                        |           |                      | TN_41       | 0.48         |
|            |              |                 |                                                      |             |             |                                                   |             |            |                        |           |                      | TN_46       | 0.41         |
|            |              |                 |                                                      |             |             |                                                   |             |            |                        |           |                      | TN_59       | 0.48         |
| TN_61      | 0.49         |                 |                                                      |             |             |                                                   |             |            |                        |           |                      |             |              |
| TN_14      | 0.52         |                 |                                                      |             |             |                                                   |             |            |                        |           |                      |             |              |
| TN_19      | 0.42         |                 |                                                      |             |             |                                                   |             |            |                        |           |                      |             |              |
| TN_26      | 0.48         |                 |                                                      |             |             |                                                   |             |            |                        |           |                      |             |              |
| TN_41      | 0.48         |                 |                                                      |             |             |                                                   |             |            |                        |           |                      |             |              |
| TN_46      | 0.42         |                 |                                                      |             |             |                                                   |             |            |                        |           |                      |             |              |
| TN_57      | 0.23         |                 |                                                      |             |             |                                                   |             |            |                        |           |                      |             |              |
| TN_61      | 0.49         |                 |                                                      |             |             |                                                   |             |            |                        |           |                      |             |              |
| TN_64      | 0.51         |                 |                                                      |             |             |                                                   |             |            |                        |           |                      |             |              |
| TET2       | c.100C>T     | p.L34F          | missense_v<br>ariant                                 | rs111948941 | COSM5941242 | P <sup>1</sup> /B <sup>2</sup> /LB <sup>3</sup>   | 0.016       | Damaging   | Damaging               | Damaging  | Benign               | TN_16       | 0.51         |
| TET2       | c.1064G>A    | p.G355D         |                                                      | rs61744960  |             | P <sup>1</sup> /LB <sup>2</sup> /B <sup>3</sup>   | 0.028       | Damaging   | Damaging               | Damaging  |                      | TN_55       | 0.49         |

|             |           |          | missense_v<br>ariant |   |   | COSM6494<br>925                                        |   |          |    |          | Possibly<br>damaging | TN_64 | 0.49 |
|-------------|-----------|----------|----------------------|---|---|--------------------------------------------------------|---|----------|----|----------|----------------------|-------|------|
| <i>TET2</i> | c.3130A>T | p.K1044* | stop_gained          | - | - | na <sup>1</sup> /VUS <sup>2</sup> /L<br>p <sup>3</sup> | - | Damaging | na | Damaging | na                   | TN_26 | 0.03 |

**Abbreviations:** CDS, coding DNA sequence; AA, amino acid; MAF, minor allele frequency; VAF, variant allele frequency; P, Pathogenic; LP, Likely Pathogenic; VUS, Variant of Unknown Significance; LB, Likely benign; B, Benign; na, not available. \* As indicated by clinical databases, such as 1: COSMIC (<https://cancer.sanger.ac.uk/cosmic/>), 2: Varsome (<https://varsome.com/>), 3: Franklin (<https://franklin.genoox.com/clinical-db/home/>).
